# Supplementary material for: DNA methylation reprogramming of functional elements during mammalian embryonic development
Source: PubMed Central journal article supplement (PMC6079081; doi:10.1038/s41421-018-0039-9), 2018-08-07
Supplement: 41421_2018_39_MOESM2_ESM.pdf [file 41421_2018_39_MOESM2_ESM.pdf]

## Supplemental Tables

**Table S1. Summary of shotgun bisulfite sequencing**

| Stage    | Replication | BSCR (%) | # CpG      | Raw Depth | Dedup Depth | 1× Cov (%) | 3× Cov (%) | 5× Cov (%) |
|----------|-------------|----------|------------|-----------|-------------|------------|------------|------------|
| Oocyte   | Rep1        | 98.9     | 26,157,159 | 71.0      | 6.1         | 92.7       | 67.9       | 49.5       |
|          | Rep2        | 99.0     |            |           |             |            |            |            |
| Sperm    | Rep1        | 99.1     | 27,416,714 | 34.2      | 33.0        | 97.2       | 96.7       | 95.9       |
|          | Rep2        | 99.3     |            |           |             |            |            |            |
|          | Rep3        | 99.3     |            |           |             |            |            |            |
| 2-cell   |             | 98.6     | 14,885,465 |           | 2.73        | 50.6       | 19.0       | 7.9        |
| 8-cell   | Rep1        | 99.2     | 26,911,155 | 15.2      | 6.3         | 94.6       | 77.3       | 51.0       |
|          | Rep2        | 99.0     |            |           |             |            |            |            |
| Morula   | Rep1        | 98.8     | 27,528,048 | 27.7      | 10.1        | 97.6       | 94.1       | 86.1       |
|          | Rep2        | 99.3     |            |           |             |            |            |            |
| ICM      | Rep1        | 99.1     | 27,474,837 | 25.4      | 10.2        | 97.4       | 93.4       | 85.7       |
|          | Rep2        | 98.8     |            |           |             |            |            |            |
| 6-week   | Rep1        | 99.1     | 27,596,867 | 32.1      | 31.7        | 97.8       | 97.2       | 96.6       |
|          | Rep2        | 99.1     |            |           |             |            |            |            |
|          | Rep3        | 99.1     |            |           |             |            |            |            |
| Placenta | Rep1        | 99.1     | 27,499,530 | 21.1      | 19.5        | 97.5       | 96.4       | 94.9       |
|          | Rep2        | 98.8     |            |           |             |            |            |            |

“BSCR” means the bisulfite conversion rate calculated by spike-in unmethylated lambda DNA. “Raw Depth” was calculated from the uniquely mapped reads before removal of PCR duplication. “Dedup Depth” indicates the sequencing depth of CpGs for two strands from the uniquely mapped reads after removal of PCR duplication. “Cov” means the proportion of mapped CpGs over total CpGs in human genome.

**Table S2. GO enrichment analyses for human promoters.**

**Table S3. Methylation levels of enhancers for both human and mouse during early embryogenesis.**

**Table S4. GO enrichment analyses for human enhancers.**

**Table S5. GO enrichment analyses for mouse enhancers.**

**Table S6. Methylation states of imprinting control regions in gametes, early embryos, placenta and skin.**
