# Supplementary material for: DNA methylation reprogramming of functional elements during mammalian embryonic development
Source: PubMed Central journal article supplement (PMC6079081; doi:10.1038/s41421-018-0039-9), 2018-08-07
Supplement: 41421_2018_39_MOESM3_ESM.pdf [file 41421_2018_39_MOESM3_ESM.pdf]

Table S2. GO enrichment analyses for human promoters.

| Category      | Term                                            |
|---------------|-------------------------------------------------|
| GOTERM_BP_FAT | GO:0007601~visual perception                    |
| GOTERM_BP_FAT | GO:0050953~sensory perception of light stimulus |
| GOTERM_BP_FAT | GO:0006096~glycolysis                           |

| Count | %        | PValue      | Genes      | List Total | Pop Hits | Pop Total | Fold Enrich |
|-------|----------|-------------|------------|------------|----------|-----------|-------------|
| 3     | 4.347826 | 0.082468039 | 810815, 78 | 31         | 216      | 13528     | 6.060932    |
| 3     | 4.347826 | 0.082468039 | 810815, 78 | 31         | 216      | 13528     | 6.060932    |
| 2     | 2.898551 | 0.099245035 | 786243, 81 | 31         | 47       | 13528     | 18.56966    |

Bonferroni Benjamini FDR

|   |   |          |
|---|---|----------|
| 1 | 1 | 68.76456 |
| 1 | 1 | 68.76456 |
| 1 | 1 | 75.66154 |
